## RESEARCH ARTICLE

# Polarized Rac-dependent protrusions drive epithelial intercalation in the embryonic epidermis of *C. elegans*

Elise Walck-Shannon<sup>1</sup>, David Reiner<sup>2,3</sup> and Jeff Hardin<sup>1,4,\*</sup>

## ABSTRACT

Cell intercalation is a fundamental, coordinated cell rearrangement process that shapes tissues throughout animal development. Studies of intercalation within epithelia have focused almost exclusively on the localized constriction of specific apical junctions. Another widely deployed yet poorly understood alternative mechanism of epithelial intercalation relies on basolateral protrusive activity. Using the dorsal embryonic epidermis of *Caenorhabditis elegans*, we have investigated this alternative mechanism using high-resolution live cell microscopy and genetic analysis. We find that as dorsal epidermal cells migrate past one another they produce F-actin-rich protrusions polarized at their extending (medial) edges. These protrusions are controlled by the *C. elegans* Rac and RhoG orthologs CED-10 and MIG-2, which function redundantly to polarize actin polymerization upstream of the WAVE complex and WASP, respectively. We also identify UNC-73, the *C. elegans* ortholog of Trio, as a guanine nucleotide exchange factor (GEF) upstream of both CED-10 and MIG-2. Further, we identify a novel polarizing cue, CRML-1, which is the ortholog of human capping Arp2/3 myosin I linker (CARMIL), that localizes to the nonprotrusive lateral edges of dorsal cells. CRML-1 genetically suppresses UNC-73 function and, indirectly, actin polymerization. This network identifies a novel, molecularly conserved cassette that regulates epithelial intercalation via basolateral protrusive activity.

**KEY WORDS:** Cell intercalation, Trio, Morphogenesis, Rac GTPase, CARMIL, LRRC16A

## INTRODUCTION

Morphogenesis requires the concurrent rearrangement of many cell types during animal development. One such coordinated cell movement, mediolateral cell intercalation, is a ubiquitous process deployed in many developmental contexts to make a tissue longer and thinner (Walck-Shannon and Hardin, 2014). Cells derived from all three germ layers can undergo mediolateral intercalation, including epithelia. The intercalation of epithelial cells is especially complex because apicobasal polarity must be maintained while cells move along the mediolateral axis. Thus far, most research on epithelial cell intercalation has focused on RhoA-mediated shrinkage of apical junctions oriented along the axis of tissue shortening (Bertet et al., 2004; Blankenship et al., 2006; Chacon-Heszele et al., 2012;

Karner et al., 2009; Lienkamp et al., 2012; Nishimura et al., 2012; Simões et al., 2014).

A less well understood mechanism of epithelial intercalation involves basolateral protrusive activity. Although basolateral protrusions have been described in several systems, including the sea urchin archenteron (Hardin, 1989), the ascidian notochordal primordium (Munro and Odell, 2002a,b) and the vertebrate neural tube (Williams et al., 2014), little information is available regarding how they form. Intriguingly, recent evidence suggests that a cooperative mechanism between apical junctional constriction and basal protrusions mediates cell intercalation in the mouse neuroepithelium (Williams et al., 2014). Together, these examples suggest that basolateral protrusive activity is an important but underappreciated mechanism of epithelial cell intercalation.

A promising context for exploring basolateral protrusive activity during epithelial cell rearrangement is the dorsal epidermis of the *C. elegans* embryo. Four hours after fertilization, 20 dorsal epidermal cells migrate past one another in the process of dorsal intercalation (Sulston et al., 1983). These intercalating cells are bona fide, apicobasally polarized epithelia, with intact apical junctions before, during and after intercalation (McMahon et al., 2001; Patel et al., 2008; Soto et al., 2002; Williams-Masson et al., 1998; E.W.-S. and J.H., unpublished). As cells become mediolaterally polarized they adopt a wedge shape; their medial tips extend contralaterally, while their lateral edges remain rounded. Eventually, the cell body and nucleus follow as an intercalating cell makes contact with contralateral seam epidermal cells, completing intercalation (Fig. 1A).

Dorsal intercalation is marked by the formation of medially directed protrusions that extend basal to the apical junction (Williams-Masson et al., 1998). These basolateral protrusions, and not apical junction rearrangement, appear to be the major driver of dorsal intercalation, as null mutants for cadherin complex components can intercalate successfully (E.W.-S. and J.H., unpublished; Costa et al., 1998). Four-dimensional microscopy indicates that basolateral protrusions in dorsal epidermal cells bear similarities to lamellipodia in other migrating cell types (Heid et al., 2001). Pharmacological studies suggest that actin filaments are required for intercalation (Williams-Masson et al., 1998). Beyond a basic role for actin, however, the molecular basis for medial tip extension is not well understood.

Actin networks can be formed through nucleation of existing filaments via the Arp2/3 complex, which must be activated by nucleation-promoting factors of the Wiskott-Aldrich syndrome protein (WASP) family, namely WASP and WAVE (Takenawa and Suetsugu, 2007). Rho family GTPases are the predominant regulators of such F-actin networks. In its GTP-bound state, Rac can activate the highly conserved, pentameric WAVE complex, while Cdc42 can activate WASP by relieving its autoinhibition (Kim et al., 2000; Miki et al., 1998; Patel et al., 2008). The RhoG ortholog *mig-2* also genetically interacts with *wsp-1* (Shakir et al., 2008), although it is unclear if the activation is direct. Rather

<sup>1</sup>Graduate Program in Genetics, University of Wisconsin-Madison, 1117 W. Johnson Street, Madison, WI 53706, USA. <sup>2</sup>Department of Pharmacology and Lineberger Comprehensive Cancer Center, University of North Carolina, 101 Manning Drive, Chapel Hill, NC 27514, USA. <sup>3</sup>Center for Translational Cancer Research, Institute of Biosciences and Technology and Department of Medical Physiology, Texas A&M Health Science Center, 2121 W. Holcombe Boulevard, Houston, TX 77030, USA. <sup>4</sup>Department of Zoology, University of Wisconsin-Madison, 1117 W. Johnson Street, Madison, WI 53706, USA.

\*Author for correspondence (jhardin@wisc.edu)

Received 17 June 2015; Accepted 26 August 2015

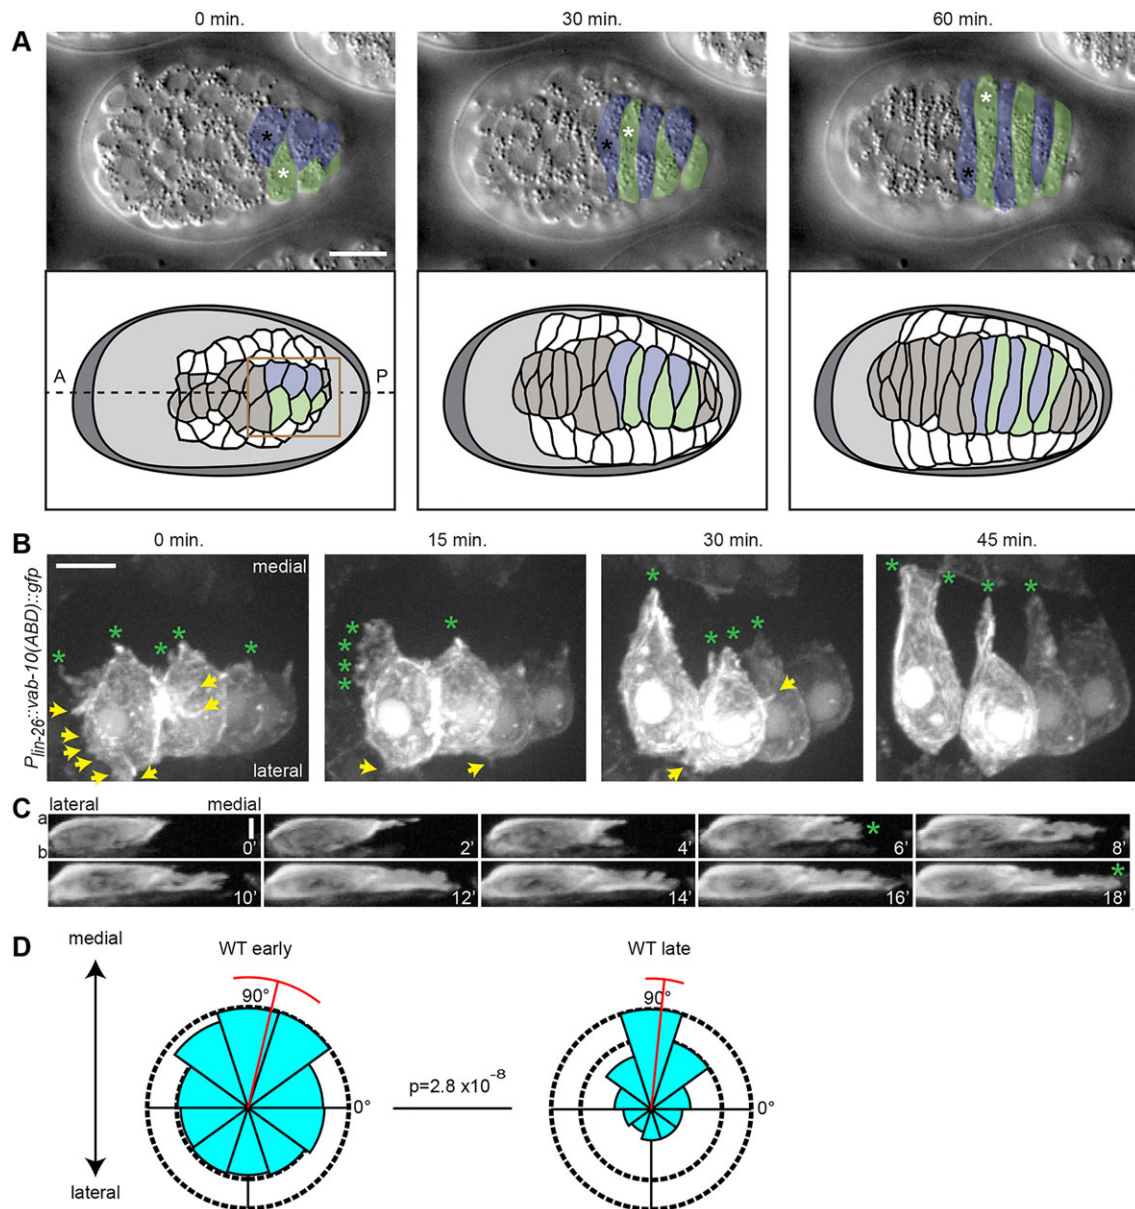

**Fig. 1. Intercalating dorsal epidermal cells exhibit basolateral protrusions.** (A) (Top) DIC images of dorsal intercalation in a wild-type *C. elegans* embryo (dorsal view). Right nucleus, black asterisk; left nucleus, white asterisk. (Bottom) Corresponding cartoon. The box indicates the approximate area magnified in B. In this and subsequent figures anterior (A) is to the left, posterior (P) to the right; right and left cells are pseudocolored in blue and green, respectively. (B) Mosaic expression of an epidermal-specific F-actin reporter [*Plin-26::vab-10(actin binding domain)::gfp*] reveals dynamic protrusions during intercalation (dorsal view). Initially, small protrusions can be seen along the medial edge (green asterisks) and at positions lateral to the leading edge (yellow arrows), but the latter are eventually withdrawn as intercalation proceeds. (C) Reslices of F-actin reporter signal orthogonal to the mediolateral axis in a second embryo show that basolateral protrusions are initially extended along the apicobasal axis but consolidate into an extending medial tip (green asterisk). Apical (a) is up, basal (b) is down. Time, min. (D) Protrusions in wild-type (WT) cells become medially polarized as intercalation proceeds. Rose plots of the angle of protrusion relative to the cell centroid early (prior to and during wedging, left) and late (during tip and cell body extension, right). Red bar denotes the circular mean and deviation (Mardia-Watson-Wheeler,  $P=2.8 \times 10^{-8}$ ). Scale bars: 10  $\mu$ m in A; 5  $\mu$ m in B,C.

surprisingly, the main Rac homolog expressed during early embryonic development in *C. elegans*, *ced-10*, is not reported to be required for intercalation (Patel et al., 2008; Soto et al., 2002). By contrast, mutations in components of the *C. elegans* WAVE complex, *WVE-1/WAVE*, *GEX-2/Sra1* and *GEX-3/Nap1*, lack any significant epidermal motility, indicating that they are required for epidermal intercalation (Patel et al., 2008; Soto et al., 2002). Previous analyses of *WSP-1/WASP* function (Withee et al., 2004) have not identified a role for *WSP-1* during dorsal intercalation, although no detailed analysis of motility was performed.

Here, we analyze in detail the formation of actin-rich dynamic protrusions in intercalating dorsal cells. We use a novel tissue-specific system to show that, rather than RhoA, the Rho family GTPases *CED-10/Rac* and *MIG-2/RhoG* redundantly control these protrusions upstream of the WAVE complex and WASP, respectively. Furthermore, we show that the guanine nucleotide exchange factor (GEF) *UNC-73/Trio*, which is known to activate both *CED-10/Rac* and *MIG-2/RhoG*, regulates intercalation. Additionally, we show that *CRML-1/CARMIL* normally polarizes protrusive activity upstream of *UNC-73* by inhibiting motility at the

lateral edges of intercalating cells. Our results represent the first detailed analysis of actin dynamics during dorsal intercalation, and identify a novel, phylogenetically conserved molecular cassette that regulates protrusion dynamics in intercalating cells that rely on basolateral protrusive activity.

## RESULTS

### Intercalating dorsal epidermal cells produce highly dynamic, actin-rich protrusions

To investigate F-actin dynamics in living embryos we utilized the actin-binding domain of a *C. elegans* spectraplaklin, VAB-10, fused to GFP and specifically expressed in the epidermis (Gally et al., 2009) as a probe, focusing on embryos that had mosaically lost the transgene in one half of intercalating cells. We found numerous protrusions throughout intercalation (Fig. 1B). Initially, protrusions formed along the entire apicobasal axis of intercalating cells, but only persisted basolaterally (Fig. 1C). As intercalation proceeded, protrusions significantly decreased in number [ $12.3 \pm 0.7$  early,  $9.4 \pm 0.8$  late (mean  $\pm$  s.e.m.);  $P < 0.005$ , two-tailed Student's *t*-test] and became increasingly restricted to the medial edge (Fig. 1D). Together, these data indicate that dynamic F-actin-containing protrusions are directly correlated with migration of dorsal epidermal cells, and that these protrusions rapidly become polarized along the mediolateral axis.

### CED-10/Rac promotes protrusive activity in dorsal epidermal cells

Next, we investigated the functional importance of these protrusions during dorsal intercalation. Rac is the canonical Rho family GTPases responsible for tractive lamellipodia (Nobes and Hall, 1995). Given the lamellar appearance of the protrusions in dorsal epithelial cells, we reasoned that Rac would be an important regulator of their motility. The *C. elegans* genome encodes two Rac orthologs, CED-10 and RAC-2, and a distinct Rac- and Cdc42-like protein called MIG-2, an ortholog of mammalian RhoG and *Drosophila* Mtl (Lundquist, 2006). Given its predominant role in morphogenesis we focused first on CED-10/Rac.

To study CED-10 specifically in epidermal cells, we developed a novel tissue-specific, inducible, transgenic expression system. We expressed canonical dominant-negative (DN) T17N or constitutively active (CA) Q61L mutants of CED-10 (Bourne et al., 1991) driven by a variant of the *lin-26* promoter that is expressed specifically in epidermal cells (see Materials and Methods) (Landmann et al., 2004). To regulate the expression of these transgenes, we exploited the endogenous nonsense-mediated mRNA decay (NMD) system, which identifies and degrades aberrant transcripts with a premature stop codon (Chang et al., 2007). The DNA encoding each fusion protein was fused to sequence encoding a long 3'UTR that contained an early stop codon, thus rendering the mRNA produced from these constructs sensitive to NMD. To make the system inducible, these tissue-specific, dominant, NMD-sensitive transgenes were put into a temperature-sensitive NMD background, *smg-1(cc546ts)* (Domeier et al., 2000). At the restrictive temperature (25°C) the transgenes are expressed, but at the permissive temperature (15°C) the transcripts are degraded, allowing inducible, tissue-specific protein expression (Fig. 2A, Fig. S1).

Conditional expression of CED-10(DN) in dorsal epidermal cells led to blunt medial edges in a subset of cells (29.4%,  $n=13$ ), which were devoid of F-actin protrusions (Fig. 2D, Movie 1). This phenotype was also seen in the *ced-10* null mutants *tm597* (Shakir et al., 2006) and *n3417* (Lundquist et al., 2001; Soto et al., 2002), but was harder to detect due to concurrent morphological defects (Fig. S2). Expression of CED-10(CA), on the other hand, led to

rounded cells that were often unable to complete intercalation (Fig. 2D) and which exhibited excessive, unpolarized protrusions (Fig. 2B,C, Movie 2). These results suggest that CED-10 controls the intercalation of epidermal cells cell-autonomously. However, owing to the partial penetrance of these defects, we hypothesized that another Rho family GTPase functions redundantly with CED-10.

### CED-10/Rac and MIG-2/RhoG function redundantly during dorsal intercalation

Embryonic RNAseq revealed no stage-appropriate expression of the other *C. elegans* Rac ortholog *rac-2* (Celniker et al., 2009) (Fig. S3, supplementary materials and methods). Therefore, we focused on *mig-2*, which can act redundantly with *ced-10* in other contexts (Lundquist et al., 2001). Examination of translational reporters of *mig-2* and *ced-10* confirmed that both proteins were present at the plasma membrane in intercalating cells (Fig. S3). Using an F-actin reporter in the dorsal epidermis, we observed that intercalating dorsal epidermal cells in *mig-2(mu28)* null mutants had significantly fewer protrusions than in wild type, whereas CA *mig-2(gm103gf)* mutants (Zipkin et al., 1997) had significantly more, unpolarized protrusions (Fig. 2B–D). These data indicate that, in addition to CED-10, MIG-2 also regulates protrusive activity during dorsal intercalation.

We next assessed whether *mig-2* and *ced-10* cooperatively regulate dorsal intercalation. Unfortunately, our attempts to generate *mig-2; ced-10* loss-of-function animals carrying the F-actin reporter repeatedly failed. However, based on DIC microscopy, *mig-2(mu28)* mutants closely resembled wild type; however, *mig-2(mu28)* strongly enhanced intercalation defects in both an epidermal-specific CED-10(DN) (Fig. 3A) or a *ced-10(n1993)* reduced-function background (Fig. 3, Fig. S4). Moreover, these defects were more severe than in either *mig-2* or *ced-10* null mutants alone, suggesting that CED-10 and MIG-2 function in parallel to control intercalation. Taken together, our results indicate that the spatiotemporal regulation of F-actin protrusions is essential for proper dorsal intercalation, and that these protrusions are regulated by both CED-10/Rac and MIG-2/RhoG.

### The actin nucleation-promoting factors WVE-1 and WSP-1 function downstream of CED-10 and MIG-2, respectively

We posited that CED-10 and MIG-2 function during intercalation by interacting with effectors known to direct dendritic actin polymerization. To determine the relationship of WVE-1/WASP to CED-10/Rac and MIG-2/RhoG we performed pairwise epistasis tests. The strong *wsp-1* loss-of-function allele *gm324* enhanced intercalation defects in *ced-10(e1993)* embryos but not *mig-2(mu28)* embryos (Fig. S5), suggesting that *wsp-1* functions in parallel to *ced-10* but in the same pathway as *mig-2* during intercalation. Consistent with this interpretation, *wsp-1(gm324)* was unable to suppress epidermal-specific CED-10(CA) (Fig. 4B), whereas it significantly suppressed intercalation defects of embryos heterozygous for *mig-2(gm103gf)* (Fig. 4A). During intercalation, *mig-2(gm103gf)* acts dominantly [heterozygotes are not significantly different from homozygotes but both are significantly different from wild type ( $P < 0.0001$ , Student's *t*-test); Fig. 4A].

WAVE is encoded by *wve-1* in *C. elegans*. There is strong evidence in *C. elegans* that null mutations in *wve-1*/WAVE, along with other components of the WAVE complex, namely *gex-2/Sra1* and *gex-3/Nap1*, eliminate epithelial morphogenesis (Patel et al., 2008; Soto et al., 2002). Indeed, we find that dorsal epidermal cells in *wve-1(ne350)* or *gex-2(ok1603)* embryos show negligible motility (Fig. S6). To investigate the role of *wve-1* and its genetic interactions during intercalation more informatively, we sought to



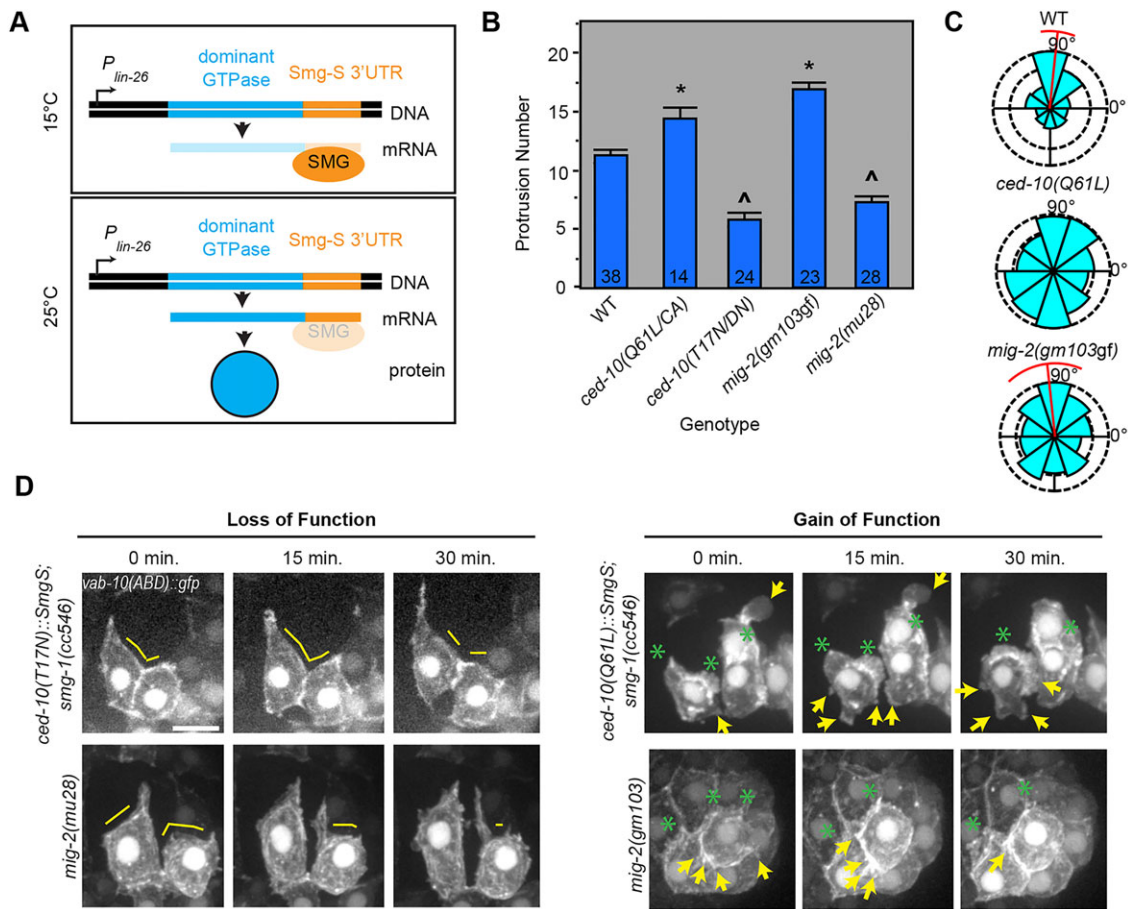

**Fig. 2. The two small GTPases CED-10/Rac and MIG-2/RhoG control protrusive activity in intercalating dorsal epidermal cells.** (A) Scheme for tissue-specific conditional expression of transgenic transcripts in *C. elegans*. (B) The average protrusion number per cell is significantly higher in *ced-10(CA)* and *mig-2(gm103gf)* mutants compared with wild type (WT), but significantly lower in *ced-10(DN)* and *mig-2(mu28)* mutants. \* $P \leq 0.02$  (ANOVA) versus wild type, *ced-10(DN)* and *mig-2(mu28)*; ^ $P \leq 1 \times 10^{-4}$  (ANOVA) versus wild type, *ced-10(CA)* and *mig-2(gm103gf)*. Error bars indicate s.e.m. Sample size (number of cells) is indicated at the bottom of each bar. (C) Protrusion angles are less medially focused in *ced-10(CA)* and *mig-2(gm103gf)* during tip extension (Mardia-Watson-Wheeler,  $P < 1 \times 10^{-6}$ ). Red bar denotes the circular mean and deviation. The distribution of *ced-10(CA)* angles was not statistically significantly different from random (Rayleigh's R,  $P = 0.86$ ). (D) Medial protrusions are decreased in *ced-10(DN)* and *mig-2* null (*mu28*) cells. Yellow lines indicate medial areas devoid of protrusive activity. Ectopic, lateral protrusions or blebs (yellow arrows) are observed in *ced-10(CA)* and, to a lesser extent, in *mig-2(gm103gf)* cells. Green asterisks indicate medial protrusions. Scale bar: 5  $\mu$ m.

achieve weak loss of *wve-1* function. To do so, we performed RNAi, which as described previously yielded partially penetrant *wve-1* knockdown (Patel et al., 2008) and intercalation failure (19.3%,  $n=31$ ). The proportion of embryos that failed to intercalate was enhanced in the *mig-2(mu28)* background (Fig. S6), suggesting that MIG-2 and WVE-1 are in separate pathways. However, *wve-1(RNAi)* also enhanced defects in the *ced-10(n1993)* background. Based on previous studies in *C. elegans* growth cones (Shakir et al., 2008), we hypothesize that weak perturbation of two components in the same pathway leads to stronger loss of that pathway's function during intercalation. Providing further evidence for this interpretation, we found that *wve-1(RNAi)* could suppress epidermal-specific, CED-10(CA) (Fig. 4B) but not overactive *mig-2(gm103gf)* (Fig. 4A, Fig. S7).

In summary, these epistasis tests suggest that, as in neuronal growth cones in *C. elegans* (Shakir et al., 2008), the two Rho family members CED-10/Rac and MIG-2/RhoG function redundantly and act via different downstream effectors: MIG-2/RhoG acts upstream of WSP-1/WASP and CED-10/Rac acts upstream of WVE-1/WAVE (Fig. 4E). As expected given this ordering of gene function,

we found that *wsp-1(gm324)* enhances both the intercalation failure (Fig. S6) and F-actin defects in *wve-1(RNAi)* (Fig. 4C,D).

### The GEF UNC-73/Trio promotes protrusive activity during dorsal intercalation

To narrow down the candidate list of *C. elegans* GEFs that activate Rac/RhoG during dorsal intercalation, we mined the literature on GEFs for high-throughput expression data and GTPase exchange specificities (Fig. S8). We predicted that the *C. elegans* Trio ortholog, UNC-73, was likely to activate Rac/RhoG during dorsal intercalation. UNC-73 is part of a unique family of proteins that contain two separate GEF domains with different GTPase specificities. Each GEF domain is defined by sequential Dbl homology (DH) and Plekstrin homology (PH) domains. The first GEF domain, GEF1, activates CED-10/Rac and MIG-2/RhoG, whereas the second GEF domain, GEF2, activates RHO-1/RhoA (Fig. 5A) (Bellanger et al., 1998; Blangy et al., 2000; Debant et al., 1996; Kubiseski et al., 2003; Steven et al., 1998; Wu et al., 2002).

Domain-specific lesions in *unc-73* allowed us to take a structure/function approach to ask which GEF domains in UNC-73 are

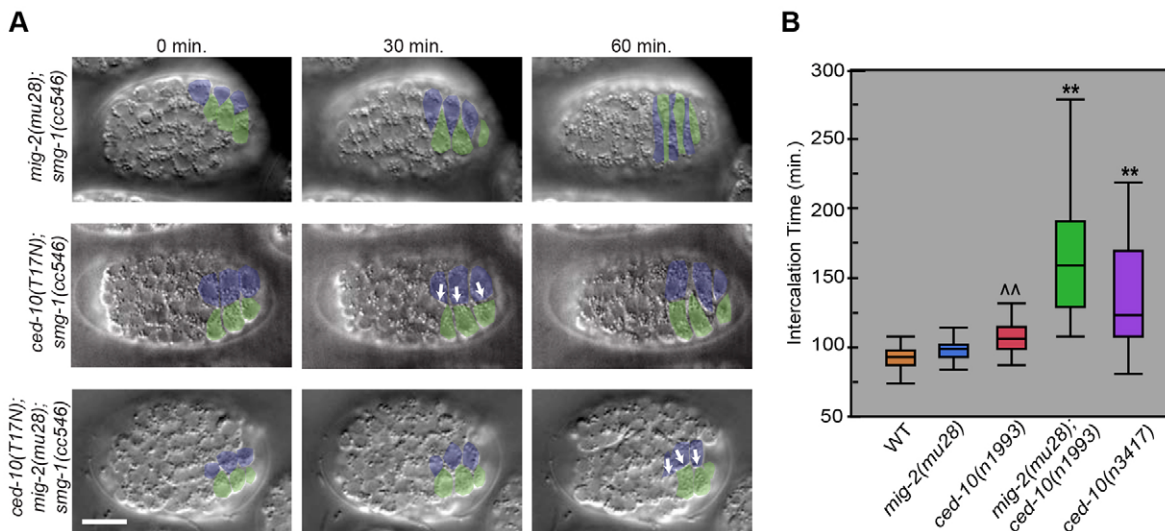

**Fig. 3. CED-10 and MIG-2 function redundantly during dorsal intercalation.** (A) *ced-10(T17N/DN)* intercalation defects are enhanced by loss of *mig-2* function. Blunt medial edges (white arrows) in *ced-10(DN)* mutants often resolve, whereas intercalation completely fails in *ced-10(DN); mig-2(mu28)* embryos. DIC images, dorsal view, 25°C. Scale bar: 10  $\mu$ m. (B) Box plots showing enhancement of intercalation defects in the moderate *ced-10(n1993)* mutant by *mig-2(mu28)*. Note that *ced-10(n1993); mig-2(mu28)* double mutants show significantly more defects ( $P \leq 3 \times 10^{-4}$ , ANOVA) than *ced-10(n3417)* null mutants. ^^ $P=0.0325$  (ANOVA) versus wild type (WT); \*\* $P \leq 3 \times 10^{-4}$  (ANOVA) versus all other groups.

required for intercalation. *gm40* is a premature stop codon that results in a protein truncated before both GEF domains; however, alternative promoters within *unc-73* allow multiple GEF2 isoforms to be expressed (Steven et al., 2005). *rh40* is a missense mutation within the GEF1 domain that decreases its ability to activate CED-10 and MIG-2 (Kubiseski et al., 2003). *ev802* is a deletion of the GEF2 domain, which can be rescued by *unc-73* DNA with the GEF1 domain deleted, suggesting that it is a GEF2-specific mutant (Steven et al., 2005). As expected, mutations disrupting GEF1 (*gm40* and *rh40*) resulted in significantly longer intercalation times than in wild type due to blunted medial edges, similar to CED-10(DN) (Fig. 5B,C). After normalizing for overall slower development, intercalation time in the GEF2 mutant *ev802* was not significantly different than similarly adjusted wild-type controls. As predicted, dorsal cell protrusions were dramatically decreased in *unc-73(gm40)* mutants (Fig. 5D, Movie 3). The requirement for the GEF1 domain of UNC-73 indicates that the main function of UNC-73 is to act as an upstream regulator of Rac/RhoG-dependent protrusive activity during dorsal intercalation. Previous biochemical studies confirm that the GEF1 domain of UNC-73 can activate both MIG-2 and CED-10, consistent with this conclusion (Kubiseski et al., 2003).

#### Protrusive activity is inhibited by the UNC-73/Trio regulator CRML-1/CARMIL

We expected UNC-73B::GFP, a GEF1-specific UNC-73 fusion protein (Steven et al., 2005), to be enriched at protrusively active medial edges of intercalating cells. Instead, we found that during dorsal intercalation UNC-73B::GFP was localized along the entire dorsal cell membrane, even at edges that are not protrusively active (Fig. 5E). Because the protrusions themselves are obviously polarized (Fig. 1D) but the localization of an upstream regulator, UNC-73, is not, we sought to identify proteins that might contribute to the spatial restriction of UNC-73 activity at or near the leading edge. We took a candidate gene approach to determine if known regulators of UNC-73, Trio or the shorter vertebrate isoform Kalirin have intercalation phenotypes, and found that *crml-1(n1962)* mutants displayed significantly increased intercalation time (Fig. S9A).

*crml-1* is a member of the conserved CARMIL (capping Arp2/3 myosin I linker) gene family first discovered in *Dictyostelium* (Jung et al., 2001). CARMILs consist of a non-canonical pleckstrin homology (PH) domain, leucine-rich repeats (LRR), a capping protein-binding domain (CPBD) and a proline-rich region (PRR) (Zwolak et al., 2013) (Fig. 6A). In vertebrates, CARMIL proteins can allosterically inhibit the ability of capping protein to bind the barbed ends of F-actin, thereby allowing more actin polymerization and hence protrusive activity (Fujiwara et al., 2014; Kim et al., 2012; Takeda et al., 2010; Yang et al., 2005). However, based on co-immunoprecipitation analysis, human CARMIL1 (LRRC16A) (Liang et al., 2009) and *C. elegans* CRML-1 (Vanderzalm et al., 2009) are also part of a complex with Trio and UNC-73, respectively. The significance of this interaction is largely uncharacterized. It has been suggested that CRML-1 functions upstream of UNC-73 to inhibit its function, as *crml-1* mutations fail to suppress *unc-73* mutations in neurons (Vanderzalm et al., 2009). Consistent with the hypothesis that CRML-1/CARMIL inhibits protrusions during intercalation, we find that nonsense mutations in *crml-1*, *gm326* and *n1962*, or *crml-1(RNAi)* result in excessive, unpolarized F-actin protrusions in dorsal epidermal cells that are inversely related to intercalating cell velocity (Fig. 6B, Movie 4). Moreover, the extra, nonpolarized protrusions in *crml-1(gm326)* embryos are suppressed by the *unc-73(rh40)* mutation (Fig. 6). Together, these data suggest that UNC-73/Trio functions downstream of a negative regulator, CRML-1/CARMIL, to inhibit protrusive activity during dorsal intercalation.

We predicted that CRML-1 might spatially restrict UNC-73 activity at the lateral (rear) edges of dorsal epidermal cells, where protrusions are usually absent, thus confining UNC-73 activity to the medial, extending tip. To examine the spatial localization of CRML-1, we made an epidermal-specific CRML-1::GFP fusion protein (using the *lbp-1* promoter; Plenefisch et al., 2000). This construct rescued the excessive F-actin protrusions in dorsal epidermal cells of *crml-1(gm326)* mutants (Fig. S9), indicating that the construct is functional and specifically required in the epidermis. Moreover, during tip extension we found that

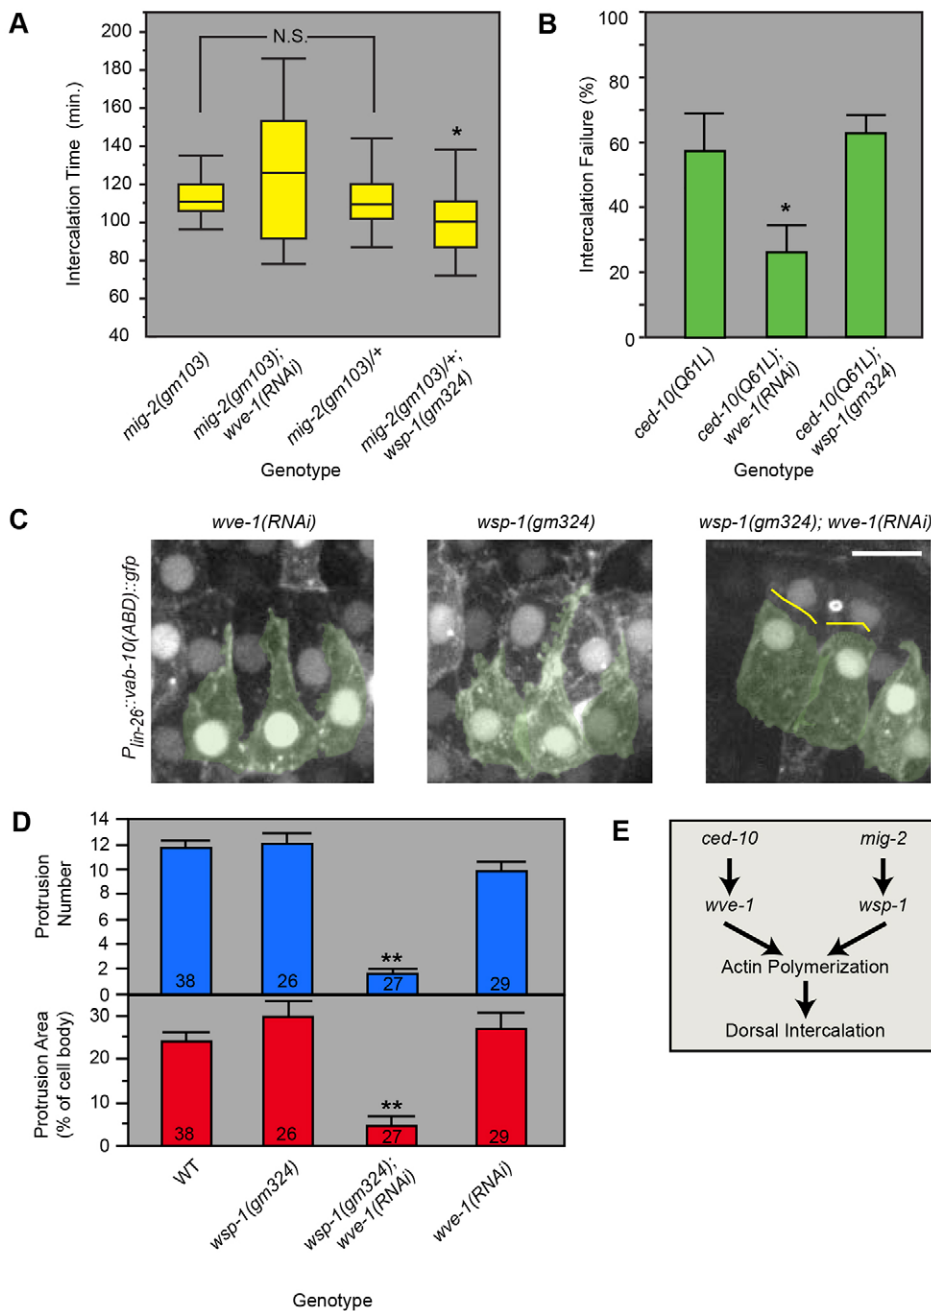

**Fig. 4. The actin nucleation activators WVE-1 and WSP-1 function downstream of CED-10 and MIG-2, respectively.** (A) Box plots of intercalation time for embryos that successfully intercalated in various Rac/WAVE/WASP loss-of-function conditions. \* $P=0.03$ , Student's *t*-test; N.S., not significant. (B) Intercalation failure of epidermal *ced-10(Q61L/CA)* is suppressed by weak *wve-1(RNAi)* (\* $P=0.03$ , Student's *t*-test) but not *wsp-1(gm324)*. Error bars indicate s.e.m. (C) WSP-1/WASP and WVE-1/WAVE function redundantly to promote F-actin protrusions in intercalating cells. Left dorsal cells are pseudocolored green. Protrusions were absent on the medial edges of *wsp-1(gm324); wve-1(RNAi)* cells (yellow lines). Scale bar: 5  $\mu\text{m}$ . (D) Protrusion number and protrusion area were significantly lower in *wsp-1(gm324); wve-1(RNAi)* embryos than in all other groups (\*\* $P \leq 1 \times 10^{-4}$ , ANOVA). Error bars indicate s.e.m. Sample size (number of cells) is given at the bottom of each bar. WT, wild type. (E) An interpretation of genetic relationships between Rac/RhoG orthologs and actin nucleation activators during intercalation.

CRML-1::GFP consistently accumulated in lateral regions of dorsal epidermal cells (compared with broadly localized PH::mCherry controls) (Fig. 7B), where protrusions are normally absent. Later during intercalation we also observed transient expression of CRML-1::GFP in the advancing tips after cells reached the contralateral side ( $n=9/10$ ; white arrowheads, Fig. 7A). This late accumulation after protrusions cease further supports the interpretation that CRML-1 inhibits protrusive activity. Together, these data suggest that polarized CRML-1 expression at the rear of intercalating cells spatially inhibits UNC-73 and dampens downstream protrusive activity.

## DISCUSSION

Our work defines a new molecular network that promotes epithelial cell intercalation, driven by Rac/RhoG. CED-10/Rac and MIG-2/RhoG function redundantly downstream of activation by the GEF1

domain of UNC-73/Trio to drive dendritic actin polymerization. Our data suggest that CED-10/Rac signals through the WAVE complex, whereas MIG-2/RhoG signals through WSP-1. Moreover, protrusive activity is polarized through the negative UNC-73/Trio regulator CRML-1/CARMIL, which accumulates at the lateral edges of dorsal epidermal cells. Together, these data suggest that cell intercalation in the dorsal epidermis of *C. elegans* proceeds via protrusions promoted by a Rac/RhoG-dependent pathway that is tightly regulated, both temporally and spatially (Fig. 8). These protrusions provide the major driving force for intercalation. When they are nearly completely abrogated, as in *wsp-1(gm324); wve-1(RNAi)* or *wve-1(ne350)* embryos, intercalation fails (Fig. 4C,D, Fig. S6). Moreover, intercalation requires that these protrusions are polarized, as shown in CED-10(CA) (Fig. 2) or *crml-1* mutants (Fig. 6), in which unpolarized protrusions result in dorsal intercalation failure (Fig. 4B) or marked delay (Fig. S9A), respectively. Together, these



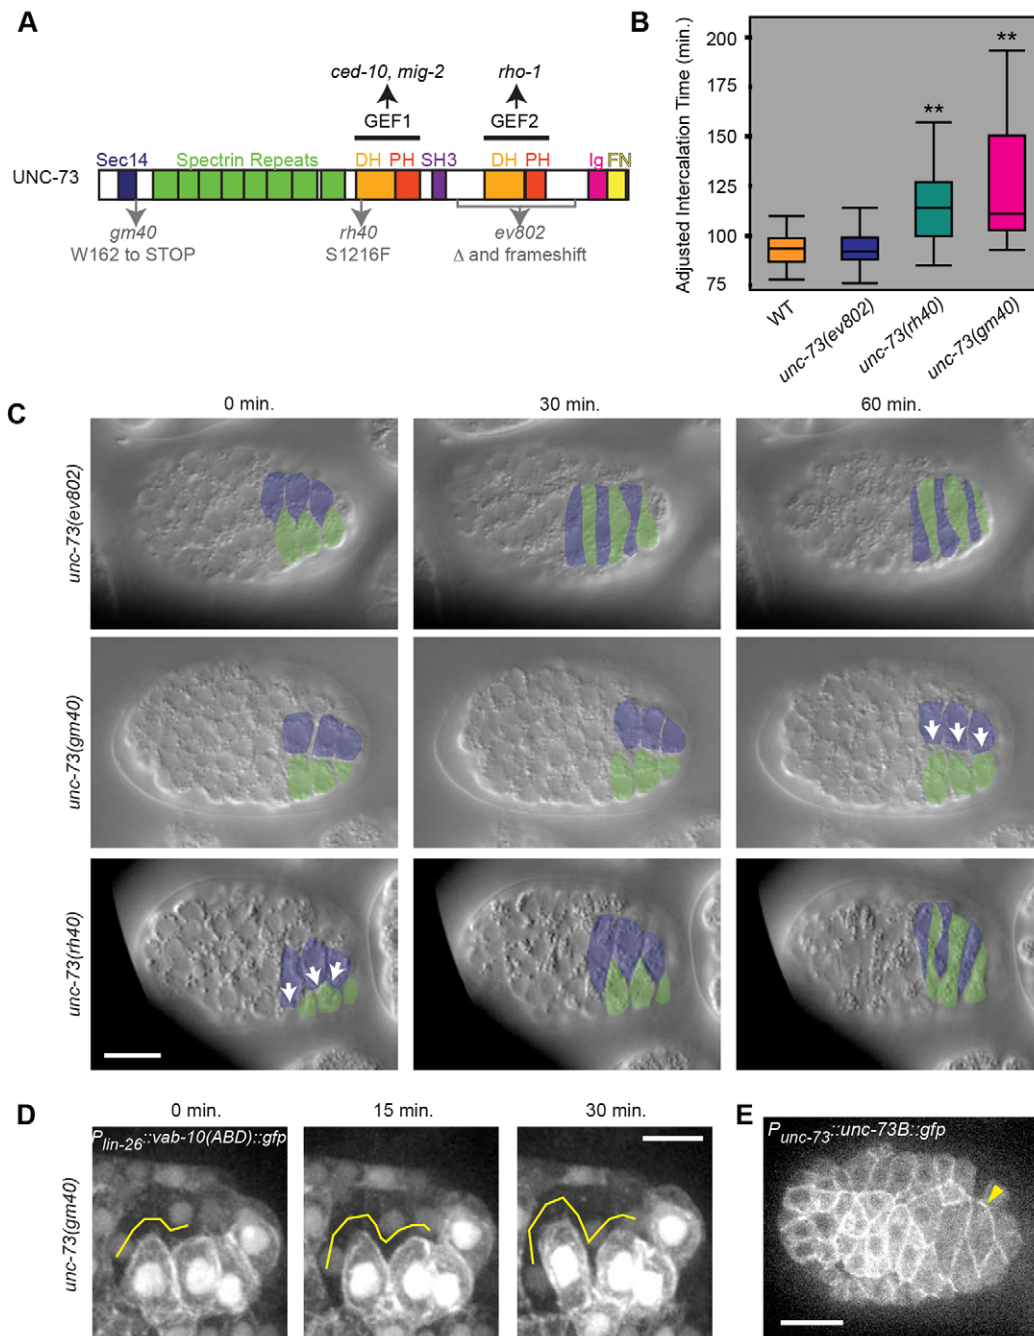

**Fig. 5. UNC-73/Trio activates protrusive activity through CED-10 and MIG-2.** (A) The two RhoGEF domains in UNC-73 have different specificities. Lesions used in this study are noted at the bottom; *gm40* and *rh40* are GEF1 mutations, whereas *ev802* is a GEF2 deletion ( $\Delta$ ). Domain annotations: DH, Dbl homology; PH, plekstrin homology; SH3, Src homology 3; Ig, immunoglobulin; FN, fibronectin. (B) Intercalation times of UNC-73 GEF1 domain (*rh40*, *gm40*) and UNC-73 GEF2 domain (*ev802*) mutants. *rh40* and *gm40* were significantly different from wild type (WT) and *ev802* (\*\* $P < 1 \times 10^{-4}$ ), but not from one another ( $P = 0.2776$ , ANOVA). Intercalation time was normalized based on timing of a landmark terminal cell division within the epidermal lineage for all groups due to differences in overall developmental timing. (C) DIC images of *unc-73* mutants during intercalation reveal blunt medial edges (white arrows) in GEF1 mutants. The first time point is 1 h after terminal epidermal cell divisions. (D) UNC-73 GEF1 controls protrusive activity in dorsal intercalating cells. Medial edges are devoid of protrusions (yellow lines) in the GEF1 mutant *gm40*. (E) A GFP fusion of the GEF1 isoform, UNC-73B, is expressed uniformly at the periphery of intercalating cells (yellow arrowhead points to lateral UNC-73B::GFP). Scale bars: 10  $\mu$ m in C,E; 5  $\mu$ m in D.

data suggest that polarized protrusions are crucial for the directional translocation of epithelial cells during dorsal intercalation in *C. elegans*.

Most of the existing work on epithelial intercalation has focused on the Rho-driven shrinkage of junctions oriented specifically in the axis of tissue shortening (Levayer et al., 2011; Nishimura et al.,

2012; Simões et al., 2014; Warrington et al., 2013). In the *C. elegans* dorsal epidermis, by contrast, zygotic *rho-1(ok2418)* mutants or epidermal-specific RHO-1(T17N) embryos can still intercalate, even though cytokinesis has failed and the cells are binucleate in the latter (E.W.-S. and J.H., unpublished). This is, to our knowledge, the first study to investigate Rac and RhoG during

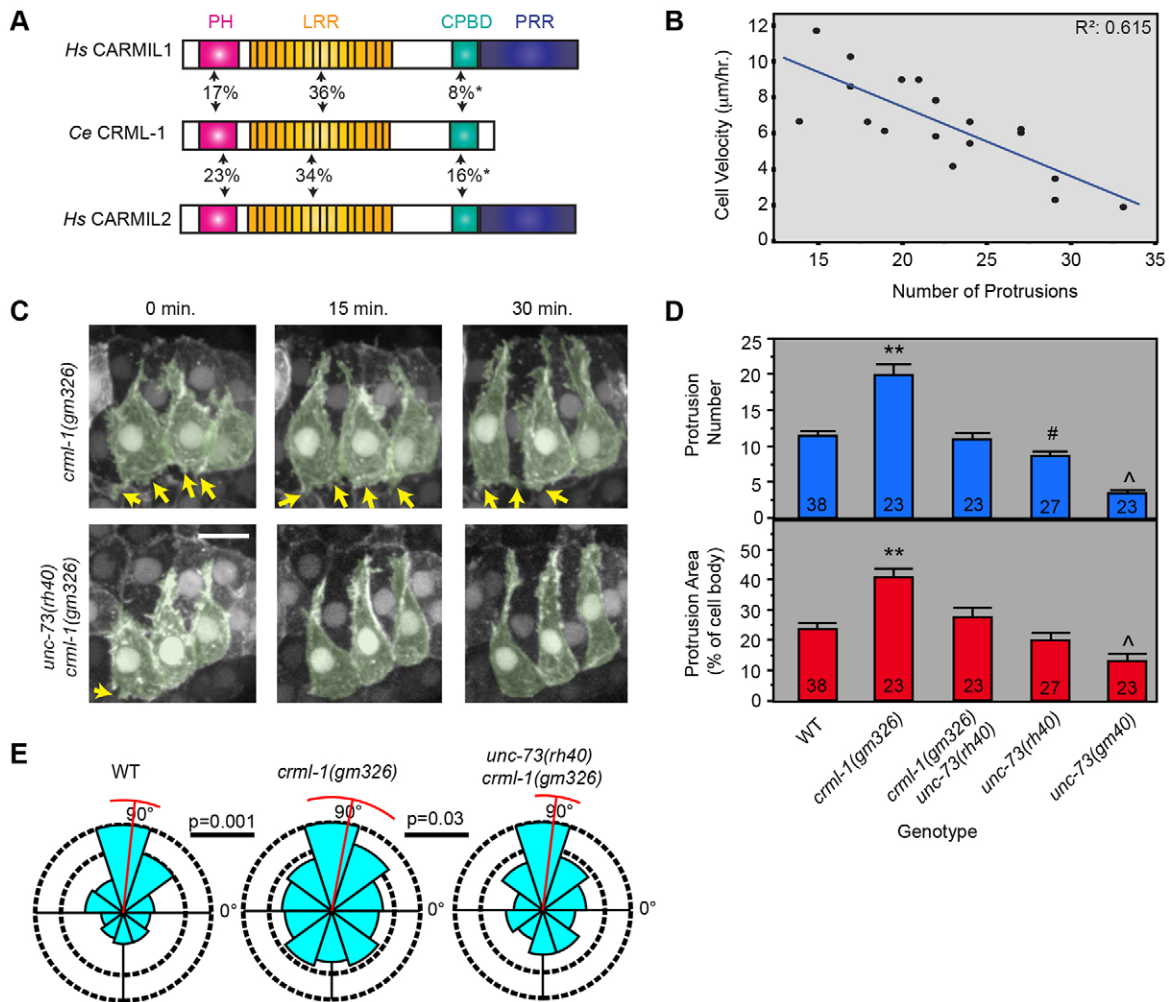

**Fig. 6. UNC-73 function is inhibited by CRML-1.** (A) Conservation between human (*Hs*) and *C. elegans* (*Ce*) CARMIL family members. Percent identity is indicated; asterisks mark conserved capping protein-binding sites (Edwards et al., 2014); see main text for domain annotations. (B) Correlation between the number of protrusions and cell velocity in *crml-1(gm326)* ( $R^2=0.615$ ;  $P<0.0001$ , F-test). (C) *crml-1(gm326)* dorsal cells have excessive protrusive activity, which can be suppressed by GEF1 loss of function in *unc-73(rh40)* mutants. Left-hand cells are pseudocolored green. Yellow arrows indicate excessive, lateral protrusions. Scale bar: 5 µm. (D) Both the increased number (top) and the increased total area (bottom) of protrusions in *crml-1(gm326)* are suppressed by *unc-73(rh40)*;  $P<1\times 10^{-4}$ ,  $P=6\times 10^{-4}$ , respectively (ANOVA). \*\*, significantly different from all other groups; #, significantly different from wild type and *unc-73(rh40)*; ^, significantly different from wild type (WT) and *unc-73(rh40)*. Error bars indicate s.e.m. Sample size (number of cells) is given at the bottom of each bar. (E) During tip extension, protrusions in *crml-1(gm326)* are less polarized than in wild type ( $P=0.001$ , Mardia-Watson-Wheeler). Protrusions in *unc-73(rh40) crml-1(gm326)* mutants are significantly more polarized than in *crml-1(gm326)* alone ( $P=0.03$ , Mardia-Watson-Wheeler).

epithelial intercalation. Previous reports suggest that basolateral protrusions exist in other epithelial tissues as well (Hardin, 1989; Munro and Odell, 2002b; Williams et al., 2014). Therefore, Rac-and/or RhoG-driven basolateral mechanisms of epithelial intercalation might be more widespread than previously appreciated.

Racs are known to act via downstream effectors that stimulate Arp2/3-dependent dendritic actin networks (Heasman and Ridley, 2008). Previously, there had been some ambiguity about whether actin polymerization was required for dorsal intercalation (Sawa, 2003; Soto et al., 2002). Here, we provide several lines of evidence that the WAVE complex and WASP are required for dorsal intercalation downstream of CED-10 and MIG-2, respectively. First, *wsp-1(gm324)* can both enhance *ced-10(n1993)* mutants and suppress *mig-2(gm103gf)* mutants. Second, *wve-1(RNAi)* can enhance *mig-2(mu28)* mutants and suppress CED-10(CA) specifically expressed in the epidermis. Third, *wsp-1(gm324)* can enhance the intercalation failure of *wve-1(RNAi)*. However, given

the relatively low penetrance of intercalation defects in *ced-10/Rac* null mutants compared with *wve-1/WAVE* null mutants, which display complete intercalation failure, additional upstream activators are likely to regulate the WAVE complex. Recent evidence suggests that within the WAVE complex there is a second, Rac-independent interaction site, which is conserved in *C. elegans*, that can be activated by a diverse set of receptors (Chen et al., 2014). Future studies focusing on whether this second interaction site is required for the WAVE complex during dorsal intercalation would likely prove informative.

Within intercalating cells, the asymmetric localization of molecules orthogonal to or along the direction of movement is a common strategy to polarize cells during intercalation (reviewed by Bertet and Lecuit, 2009; Gray et al., 2011; Walck-Shannon and Hardin, 2014; Wallingford, 2012; Zallen, 2007). During intercalation of the *Drosophila* germband, for example, actin, nonmuscle myosin II and its regulators accumulate at shrinking junctions, whereas cadherin is enriched at junctions that persist



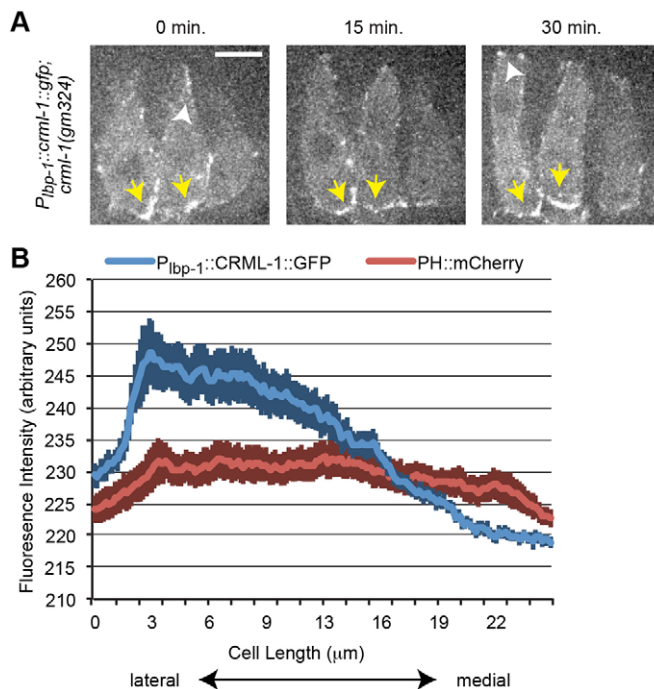

**Fig. 7. Epidermal CRML-1::GFP is enriched laterally in dorsal cells.** (A) A rescuing CRML-1::GFP transgene localizes to the lateral edges of dorsal cells (yellow arrows). White arrowheads point to transient areas of CRML-1::GFP expression at the medial edge, which accumulate after the tip reaches the contralateral edge. Scale bar: 5  $\mu m$ . (B) CRML-1::GFP is enriched laterally in intercalating dorsal epidermal cells. Average fluorescence intensity along the mediolateral axis for CRML-1::GFP (blue) and PH::mCherry (red). Measurements were averaged from at least seven intercalating dorsal cells during tip extension. Darker vertical bars indicate s.e.m. at each position.

during intercalation (Blankenship et al., 2006; Levayer et al., 2011; Simões et al., 2010; Zallen and Wieschaus, 2004). Asymmetric localization of proteins in epithelial cells that use basolateral protrusive activity during rearrangement has not previously been examined. We found that a negative regulator of UNC-73/Trio,

CRML-1/CARMIL, predominantly localizes to lateral edges, where protrusions are normally absent. We hypothesize that CRML-1 polarization contributes to the directional movement of intercalating cells by preventing non-directional (lateral) protrusions. At a genetic level, *crml-1* regulates the activity of *unc-73*, rather than its expression in dorsal epidermal cells, because UNC-73::GFP localization in the *crml-1(gm326)* background is indistinguishable from that in wild type (Fig. S10). It remains unclear how CRML-1 becomes spatially restricted in its localization. Repeated attempts to disrupt dorsal intercalation by perturbing the function of conserved homologs of planar cell polarity components have failed to detect defects (King et al., 2009; E.W.-S. and J.H., data not shown); it is therefore likely that additional proteins are involved. CRML-1::GFP also accumulated at the tips of cells as intercalation concluded. This separate pool of CRML-1 might represent highly localized areas of UNC-73 inhibition at the migrating tips as they make contact with contralateral seam cells; alternatively, this pool could have a second, separate function that relates to capping protein at medial tips.

There are multiple isoforms of human CARMIL. Most effort has focused on CARMIL1, which can form a complex with Trio and promotes protrusive activity (Liang et al., 2009). The role of CARMILs in vertebrates has focused almost entirely on their inhibition of capping protein (Edwards et al., 2014). However, *C. elegans* CRML-1 seems to inhibit protrusive activity (this work; Vanderzalm et al., 2009) rather than promote it. The opposite effect would be expected if CRML-1 acts primarily via anti-capping protein activity. Here we show that CRML-1 has a crucial role in regulating F-actin dynamics through the inhibition of the RacGEF (GEF1) activity of UNC-73. In this regard, *crml-1* loss of function more closely mimics CARMIL2 mutant phenotypes in vertebrate cells, which include loss of cell polarity and multiple lamellipodia (Liang et al., 2009). It is possible that *C. elegans* CRML-1 retains functions of both CARMIL1 (Trio binding/inhibition) and CARMIL2 (regulation of cell polarity/capping protein activity), and that these are each deployed in different contexts in *C. elegans*. CARMILs might have undergone subfunctionalization in vertebrates for separate, more specialized functions.

Our study unites previous observations (Patel et al., 2008; Williams-Masson et al., 1998) into a concise model for dorsal

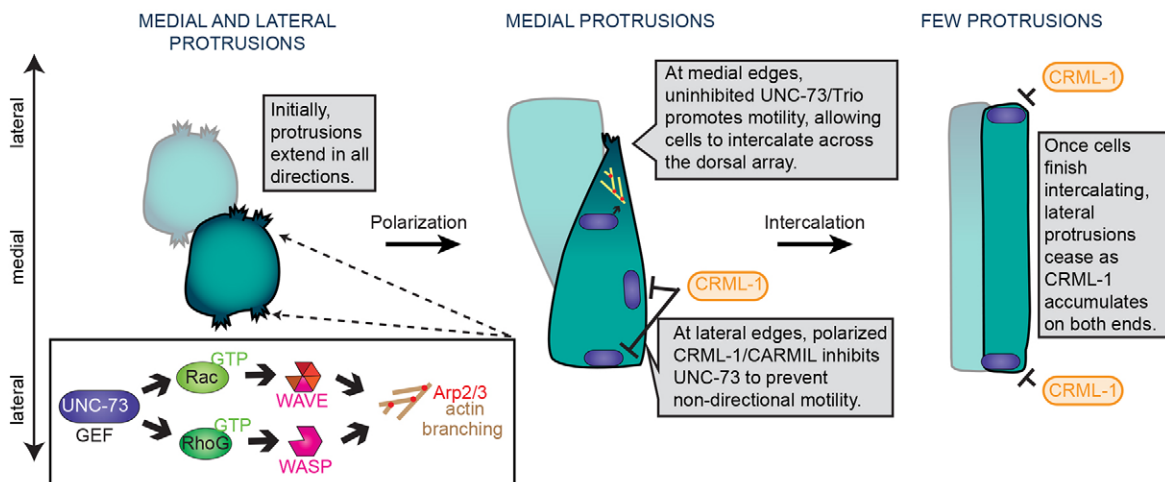

**Fig. 8. A model for the molecular control of protrusive activity during dorsal intercalation.** Early, as intercalating cells begin to adopt a polarized, wedge-shaped morphology, protrusive activity is broadly distributed at the cell periphery. As intercalation proceeds, protrusions focus medially and basolaterally to produce a single, extending tip. As cell bodies translocate, cells migrate past one another and intercalation completes. The GEF UNC-73, which is broadly distributed, activates CED-10 and MIG-2, but only in regions devoid of CRML-1, which inhibits UNC-73 at lateral edges. Accumulation of CRML-1 at the contralateral edges of intercalating cells may promote protrusive downregulation as intercalation completes.

intercalation in *C. elegans*, in which Rac/RhoG control of dendritic actin polymerization is the major driver of medial protrusions, and hence cell rearrangement. This observation also raises the intriguing possibility that other epithelia use both mechanisms to varying degrees. Asymmetric Rho-mediated constriction of apical junctions has motivated most study of intercalation within the *Drosophila* germband, but embryos that carry mutations for *eve* and Toll-like receptors, which pattern these molecular asymmetries, still have germbands that extend 1.6× their original length, compared with 2× extension in wild type (Irvine and Wieschaus, 1994; Paré et al., 2014). Although oriented cell divisions may contribute to the remaining tissue extension (da Silva and Vincent, 2007), it is also possible that basolateral protrusions contribute to convergent extension in the *Drosophila* germband but have escaped detection thus far. Further evidence that the Rac/RhoG-dependent mechanism described here may constitute an additional general mechanism for driving intercalation in epithelia is suggested by studies of the mouse neural tube. In this neuroepithelium, the planar cell polarity pathway directs both apical junctional rearrangement and basolateral protrusions to achieve mediolateral intercalation (Williams et al., 2014). These results support the idea that apical and basolateral pathways during intercalation are not mutually exclusive. Instead, different epithelial cell types might utilize each pathway to varying extents. Understanding the extent to which various epithelial cells use one program or the other and the reasons why various epithelia favor one pathway over another is an important question for future research.

## MATERIALS AND METHODS

### Nematode strains and genetics

*C. elegans* were maintained on OP50 bacteria as previously described (Brenner, 1974). The wild-type strain was Bristol N2. Experiments were performed at 20°C unless otherwise stated. The following genetic lesions were utilized in this study. LG1: *smg-1(cc546ts)*, *unc-73(ev802)*, *unc-73(gm40)*, *unc-73(rh40)*, *crml-1(gm326)*. LGIV: *ced-10(n1993)*, *ced-10(n3417)*, *ced-10(tm597)*, *wsp-1(gm324)*. LGX: *mig-2(gm103gf)*, *mig-2(mu28)*. The following transgenic arrays were made for, or utilized in, this study: *mcEx227[P<sub>lin-26</sub>::VAB-10(actin binding domain)::GFP, rol-6(su1006)]* (Gally et al., 2009), *jcEx222[P<sub>lin-26</sub>::ced-10(T17N/DN)::smg sensitive 3'UTR, sur-5::mCherry]*, *jcEx224[P<sub>unc-73</sub>::UNC-73::GFP, rol-6(su1006)]*, *rels6[P<sub>lin-26</sub>::ced-10(Q61L/CA)::smg sensitive 3'UTR, rol-6(su1006), P<sub>myo-3</sub>::gfp]*, *lts44[P<sub>pie-1</sub>::PH<sub>PLC1δ</sub>::mCherry, unc-119(+)]* (Kachur et al., 2008). Additional strains are described in the supplementary materials and methods.

### F-actin imaging

We imaged live embryos mosaicly expressing a previously validated F-actin reporter, *mcEx227[P<sub>lin-26</sub>::VAB-10(actin binding domain)::GFP, rol-6(su1006)]* (Gally et al., 2009), in the dorsal epidermis with a Nikon Eclipse E600 microscope connected to a Yokogawa CSU10 spinning disk scanhead. Images were gathered with a Hamamatsu ORCA-ER charge-coupled device (CCD) camera and Micromanager software (Edelstein et al., 2010, 2014) with a z-slice spacing of 0.4 μm. ImageJ (Schneider et al., 2012) was used to project 20–25 z-slices, which is shown in dorsal view images. Reslices were also performed in ImageJ. *mcEx227* was crossed into all other genetic backgrounds to maintain similar expression levels.

### Protrusion quantification

Protrusions were quantified from maximum projections of z-stacks of F-actin reporter expression as described above. Relative protrusion area was calculated as the ratio between a cell's area in maximum projection images (which includes all protrusions) to a cell's lateral area (measured at the depth of the cell nucleus). Protrusion number was obtained by counting aggregations of F-actin reporter signal extending at least 0.5 μm from the cell body. Protrusion position was recorded using the ROI tool in Image J. Angles were obtained using trigonometric functions in Microsoft Excel to compare protrusion position relative to the cell centroid (also calculated in ImageJ). At least 15

cells from at least 10 embryos were analyzed per genotype. JMP software (SAS) was used for statistics and graphing of protrusion area and number; PAST was used for angular statistics and graphs (Hammer et al., 2001). We designated cells as 'early' if they were in the process of polarizing into a wedge shape and 'late' if the cell tip or body had begun to extend. Cell velocity was calculated by measuring medial edge displacement over time. Linear regression and statistical analyses were carried out in JMP.

### Dorsal intercalation time measurements

Four-dimensional (4D) DIC movies were gathered on either a Nikon Optiphot-2 connected to a QImaging camera or Olympus BX50 connected to a Scion camera. ImageJ plugins (available at <http://worms.zoology.wisc.edu/research/4d/4d.html>) were used to analyze movies. For this study, we defined intercalation time as the time between terminal epidermal (C<sub>pa</sub>a/a/p) divisions and when contralateral nuclei met at the midline after cell migration was complete. For *unc-73* mutants, intercalation time was measured relative to the time between the C<sub>pa</sub>a and C<sub>pa</sub>a(a/p) divisions. At least 20 embryos from at least 10 mounts were analyzed per genotype. JMP was used to create box plots and for statistical analysis.

### NMD-dependent conditional expression system

The epidermal-specific, NMD-sensitive plasmid backbone was made as follows. (1) The hybrid eFGH *lin-26* promoter (including minimal *myo-2* promoter) is expressed only in the epidermis and support cells (Landmann et al., 2004); *P<sub>lin-26</sub>(eFGH)* was amplified from pML433 with primers (5'-3'; lowercase letters are restriction sites) TTTTTTgcccgcgCGCCCG-AGGTTAATATCTGAGCTCC and TTTTTTggatccTggccggccATCATT-TTTCTGAGCTCGGTACCCTCC and cloned into pBluescript cut with *NotI/BamHI* (pCM1.1). (2) The NMD-sensitive 3'UTR sequence (inverted *let-858* coding sequence without a sense polyadenylation sequence) was amplified from pPD118.44 (gift of A. Fire, Stanford University, CA, USA) using primers TTTTatcgatcctaaTCGTCGAGTCGGTACAATCACC and TTTTggcccGCTCATGTTTAGATTGGATTG and cloned into pCM1.1 digested with *Clal/ApaI* (pCM1.3). pCM1.1 plasmid for this step was grown in SCS110 bacteria because *Clal* is Dam sensitive. The wild-type *ced-10* sequence was amplified from pPR37 (Reddien and Horvitz, 2000) using primers AAAAAAAAgcccggcctggcATGCAAGCGATCAAATGTGTCTCG-TCG and TTTTTTatcgatTTAGAGACCCGTACACTTGTCTTTTTGG and cloned into pCM1.3 using *FseI/Clal* to generate pCM3.2. To make *ced-10(Q61L/CA)* (pCM3.3) and *ced-10(T17N/DN)* (pEWS27) variants, we used PCR site-directed mutagenesis, with pCM3.2 as template and the following primers (forward and reverse; underlining indicates bases mutated relative to wild type): *ced-10(Q61L/CA)*, GGGATACAGCTGGACTGGA-AGATTACGATCGAC and GTCGATCGTAATCTTCCAGTCCAGCTG-TATCCC; *ced-10(T17N/DN)*, ACTGTCTCCTGATATCCTACAC and TTTTACCAGCGCTCCGTC.

Gonads of wild-type animals were microinjected with these constructs at 40 ng/μl and a co-injection marker (Mello and Fire, 1995). Resulting lines in the wild-type background were screened for defects using *smg-1* feeding RNAi (Kamath et al., 2003). Representative lines were crossed into the *smg-1(cc546ts)* background, which can be detected by PCR using forward CAGTCGTGAGCTTTGGATGCGTGC and reverse TCGGGGATACGC-AGATTCTTCCC followed by digestion specifically of wild-type product using *MsiI*. At least three lines were analyzed per construct. The resulting extrachromosomal array *jcEx222[P<sub>lin-26</sub>::ced-10(T17N/DN)::smg sensitive 3'UTR, sur-5::mCherry]* was used for experiments. *ced-10(Q61L/CA)* was integrated into the genome using UV irradiation, resulting in *rels6[P<sub>lin-26</sub>::ced-10(Q61L/CA)::smg sensitive 3'UTR, rol-6(su1006), P<sub>myo-3</sub>::gfp]*. Lines were maintained at 15°C and heat shocked at 25°C for 24 h to induce transgene expression prior to filming (unless otherwise noted). Crosses were performed at 15°C. Filming was at 20°C. For GFP induction using the NMD system, see the supplementary materials and methods.

### RNAi

T7 and T3 sites were added to full-length *wve-1* cDNA derived from wild-type worms by PCR with primers forward TAATACGATCACTATAGG-TCCATCAACAATCCATCGTG and reverse CCCTTTAGTGAGGGTT-AATCCCATTTCATCATCAGC. From the PCR product, MegaScript

kits (Ambion) were used to synthesize double-stranded *wve-1* RNA, which was injected (Zipperlen et al., 2001) into the pseudocoelom at 0.5 µg/µl. As described previously for feeding RNAi, injection RNAi elicited partial knockdown of *wve-1* (Patel et al., 2008). For *ced-10(Q61L/CA)* suppression, animals were incubated at a semi-permissive temperature of 18°C for 6 h prior to mounting. For *mig-2(gm103/CA)* suppression, animals were incubated at 20°C for 16 h. For *vav-1* RNA, see the supplementary materials and methods.

### UNC-73B::GFP

A rescuing *unc-73* GEF1 construct, pNW248 (*Punc-73::unc-73B::GFP*) (Steven et al., 2005), was microinjected into the gonads of wild-type animals (Mello and Fire, 1995) at 10 ng/µl to create the extrachromosomal array *jcEx224[P<sub>unc-73</sub>::UNC-73::GFP, rol-6(su1006)]*.

### Epidermal-driven CRML-1::GFP

*lbp-1* is expressed predominantly in the epidermis at embryonic stages (Plenefisch et al., 2000). *crml-1* cDNA was cloned into an existing *P<sub>lbp-1</sub>::GFP* vector, pSL500 (Fridolfsson and Starr, 2010), using Gibson assembly (Gibson, 2011). The following primers were used (forward and reverse; uppercase letters indicate regions complementary to template and lowercase letters indicate overhangs complementary to vector): pSL500, ATGAGT-AAAGGAGAAGAAGACTTTTCAC and CATGGTTGGCTAGGTCGATG-AATG; *crml-1* cDNA, tgcactgccaaccatgTCCATGTCGAGGAGCACC and agttcttctcttactcaTTTTGGAAAATTCTAGCCATATCAGC. The resulting construct (pEWS38) was injected into *crml-1(gm326)* mutants at 10 ng/µl. *crml-1(gm326)* can be detected using PJV98/PJV99 (Vanderzalm et al., 2009) and *AccI* digestion. Three independently derived lines were analyzed. Intensity measurements of CRML-1::GFP were performed using the Plot Profile tool with congruent rectangular selections outlining each dorsal cell in ImageJ. Cells came from at least five different embryos.

### Acknowledgements

Some strains were provided by the CGC, which is funded by the NIH Office of Research Infrastructure Programs [P40 OD010440]. Bethany Lucas created the *wve-1* cDNA clone used for RNAi. We thank the laboratories of E. Lundquist and G. Garriga for graciously providing many worm strains used in this study and R. Steven for providing pNW248 DNA. The SAGE data were produced at the Michael Smith Genome Sciences Centre with funding from Genome Canada; the embryonic RNA sequencing data were produced by the Waterston laboratory at the University of Washington. We are grateful to members of the J.H. laboratory for helpful input.

### Competing interests

The authors declare no competing or financial interests.

### Author contributions

E.W.-S. developed concepts and approach, performed experiments, analyzed data and prepared the manuscript. D.R. developed the nonsense-mediated mRNA decay method for inducible expression of dominant transgenes and edited the manuscript. J.H. developed concepts and approach, developed software tools and analysis procedures and edited the manuscript.

### Funding

This work was supported by grants from the National Science Foundation [IOB 1426555] and National Institutes of Health (NIH) [GM058038 to J.H. and GM085309 to D.R.]. E.W.-S. was supported by a Genetics Training Grant from the NIH [GM07133]. Deposited in PMC for release after 12 months.

### Supplementary information

Supplementary information available online at <http://dev.biologists.org/lookup/suppl/doi:10.1242/dev.127597/-DC1>

### References

Bellanger, J.-M., Lazaro, J.-B., Diriong, S., Fernandez, A., Lamb, N. and Debant, A. (1998). The two guanine nucleotide exchange factor domains of Trio link the Rac1 and the RhoA pathways in vivo. *Oncogene* **16**, 147-152.  
 Bertet, C. and Lecuit, T. (2009). Planar polarity and short-range polarization in *Drosophila* embryos. *Semin. Cell Dev. Biol.* **20**, 1006-1013.

Bertet, C., Sulak, L. and Lecuit, T. (2004). Myosin-dependent junction remodelling controls planar cell intercalation and axis elongation. *Nature* **429**, 667-671.  
 Blangy, A., Vignal, E., Schmidt, S., Debant, A., Gauthier-Rouvière, C. and Fort, P. (2000). TrioGEF1 controls Rac- and Cdc42-dependent cell structures through the direct activation of rhoG. *J. Cell Sci.* **113**, 729-739.  
 Blankenship, J. T., Backovic, S. T., Sanny, J. S. P., Weitz, O. and Zallen, J. A. (2006). Multicellular rosette formation links planar cell polarity to tissue morphogenesis. *Dev. Cell* **11**, 459-470.  
 Bourne, H. R., Sanders, D. A. and McCormick, F. (1991). The GTPase superfamily: conserved structure and molecular mechanism. *Nature* **349**, 117-127.  
 Brenner, S. (1974). The genetics of *Caenorhabditis elegans*. *Genetics* **77**, 71-94.  
 Celniker, S. E., Dillon, L. A. L., Gerstein, M. B., Gunsalus, K. C., Henikoff, S., Karpen, G. H., Kellis, M., Lai, E. C., Lieb, J. D., MacAlpine, D. M. et al. (2009). Unlocking the secrets of the genome. *Nature* **459**, 927-930.  
 Chacon-Heszele, M. F., Ren, D., Reynolds, A. B., Chi, F. and Chen, P. (2012). Regulation of cochlear convergent extension by the vertebrate planar cell polarity pathway is dependent on p120-catenin. *Development* **139**, 968-978.  
 Chang, Y.-F., Imam, J. S. and Wilkinson, M. F. (2007). The nonsense-mediated decay RNA surveillance pathway. *Annu. Rev. Biochem.* **76**, 51-74.  
 Chen, B., Brinkmann, K., Chen, Z., Pak, C. W., Liao, Y., Shi, S., Henry, L., Grishin, N. V., Bogdan, S. and Rosen, M. K. (2014). The WAVE regulatory complex links diverse receptors to the actin cytoskeleton. *Cell* **156**, 195-207.  
 Costa, M., Raich, W., Agbunag, C., Leung, B., Hardin, J. and Priess, J. R. (1998). A putative catenin-cadherin system mediates morphogenesis of the *Caenorhabditis elegans* embryo. *J. Cell Biol.* **141**, 297-308.  
 da Silva, S. M. and Vincent, J.-P. (2007). Oriented cell divisions in the extending germband of *Drosophila*. *Development* **134**, 3049-3054.  
 Debant, A., Serra-Pagès, C., Seipel, K., O'Brien, S., Tang, M., Park, S. H. and Streuli, M. (1996). The multidomain protein Trio binds the LAR transmembrane tyrosine phosphatase, contains a protein kinase domain, and has separate rac-specific and rho-specific guanine nucleotide exchange factor domains. *Proc. Natl. Acad. Sci. USA* **93**, 5466-5471.  
 Domeier, M. E., Morse, D. P., Knight, S. W., Portereiko, M., Bass, B. L. and Mango, S. E. (2000). A link between RNA interference and nonsense-mediated decay in *Caenorhabditis elegans*. *Science* **289**, 1928-1930.  
 Edelstein, A., Amodaj, N., Hoover, K., Vale, R. and Stuurman, N. (2010). Computer control of microscopes using µManager. *Curr. Protoc. Mol. Biol.* Chapter 14, Unit 14.20.  
 Edelstein, A. D., Tsuchida, M. A., Amodaj, N., Pinkard, H., Vale, R. D. and Stuurman, N. (2014). Advanced methods of microscope control using µManager software. *J. Biol. Methods* **1**, 10.  
 Edwards, M., Zwolak, A., Schafer, D. A., Sept, D., Dominguez, R. and Cooper, J. A. (2014). Capping protein regulators fine-tune actin assembly dynamics. *Nat. Rev. Mol. Cell Biol.* **15**, 677-689.  
 Fridolfsson, H. N. and Starr, D. A. (2010). Kinesin-1 and dynein at the nuclear envelope mediate the bidirectional migrations of nuclei. *J. Cell Biol.* **191**, 115-128.  
 Fujiwara, I., Rimmert, K., Piszczek, G. and Hammer, J. A. (2014). Capping protein regulatory cycle driven by CARMIL and V-1 may promote actin network assembly at protruding edges. *Proc. Natl. Acad. Sci. USA* **111**, E1970-E1979.  
 Gally, C., Wissler, F., Zahreddine, H., Quintin, S., Landmann, F. and Labouesse, M. (2009). Myosin II regulation during *C. elegans* embryonic elongation: LET-502/ROCK, MRCK-1 and PAK-1, three kinases with different roles. *Development* **136**, 3109-3119.  
 Gibson, D. G. (2011). Enzymatic assembly of overlapping DNA fragments. *Methods Enzymol.* **498**, 349-361.  
 Gray, R. S., Roszko, I. and Solnica-Krezel, L. (2011). Planar cell polarity: coordinating morphogenetic cell behaviors with embryonic polarity. *Dev. Cell* **21**, 120-133.  
 Hammer, Ø., Harper, D. A. T. and Ryan, P. D. (2001). PAST: paleontological statistics software package for education and data analysis. *Palaeontol. Electron.* **4**, 9.  
 Hardin, J. (1989). Local shifts in position and polarized motility drive cell rearrangement during sea urchin gastrulation. *Dev. Biol.* **136**, 430-445.  
 Heasman, S. J. and Ridley, A. J. (2008). Mammalian Rho GTPases: new insights into their functions from in vivo studies. *Nat. Rev. Mol. Cell Biol.* **9**, 690-701.  
 Heid, P. J., Raich, W. B., Smith, R., Mohler, W. A., Simokat, K., Gendreau, S. B., Rothman, J. H. and Hardin, J. (2001). The zinc finger protein DIE-1 is required for late events during epithelial cell rearrangement in *C. elegans*. *Dev. Biol.* **236**, 165-180.  
 Irvine, K. D. and Wieschaus, E. (1994). Cell intercalation during *Drosophila* germband extension and its regulation by pair-rule segmentation genes. *Development* **120**, 827-841.  
 Jung, G., Rimmert, K., Wu, X., Volosky, J. M. and Hammer, J. A. (2001). The Dicotylostelium CARMIL protein links capping protein and the Arp2/3 complex to type I myosins through their SH3 domains. *J. Cell Biol.* **153**, 1479-1498.  
 Kachur, T. M., Audhya, A. and Pilgrim, D. B. (2008). UNC-45 is required for NMY-2 contractile function in early embryonic polarity establishment and germline cellularization in *C. elegans*. *Dev. Biol.* **314**, 287-299.



- Kamath, R. S., Fraser, A. G., Dong, Y., Poulin, G., Durbin, R., Gotta, M., Kanapin, A., Le Bot, N., Moreno, S., Sohmann, M. et al.** (2003). Systematic functional analysis of the *Caenorhabditis elegans* genome using RNAi. *Nature* **421**, 231-237.
- Karner, C. M., Chirumamilla, R., Aoki, S., Igarashi, P., Wallingford, J. B. and Carroll, T. J.** (2009). Wnt9b signaling regulates planar cell polarity and kidney tubule morphogenesis. *Nat. Genet.* **41**, 793-799.
- Kim, A. S., Kakalis, L. T., Abdul-Manan, N., Liu, G. A. and Rosen, M. K.** (2000). Autoinhibition and activation mechanisms of the Wiskott-Aldrich syndrome protein. *Nature* **404**, 151-158.
- Kim, T., Raviliou, G. E., Sept, D. and Cooper, J. A.** (2012). Mechanism for CARMIL protein inhibition of heterodimeric actin-capping protein. *J. Biol. Chem.* **287**, 15251-15262.
- King, R. S., Maiden, S. L., Hawkins, N. C., Kidd, A. R., Kimble, J., Hardin, J. and Walston, T. D.** (2009). The N- or C-terminal domains of DSH-2 can activate the *C. elegans* Wnt/beta-catenin asymmetry pathway. *Dev. Biol.* **328**, 234-244.
- Kubiseski, T. J., Culotti, J. and Pawson, T.** (2003). Functional analysis of the *Caenorhabditis elegans* UNC-73B PH domain demonstrates a role in activation of the Rac GTPase in vitro and axon guidance in vivo. *Mol. Cell Biol.* **23**, 6823-6835.
- Landmann, F., Quintin, S. and Labouesse, M.** (2004). Multiple regulatory elements with spatially and temporally distinct activities control the expression of the epithelial differentiation gene *lin-26* in *C. elegans*. *Dev. Biol.* **265**, 478-490.
- Levayer, R., Pelissier-Monier, A. and Lecuit, T.** (2011). Spatial regulation of Dia and Myosin-II by RhoGEF2 controls initiation of E-cadherin endocytosis during epithelial morphogenesis. *Nat. Cell Biol.* **13**, 529-540.
- Liang, Y., Niederstrasser, H., Edwards, M., Jackson, C. E. and Cooper, J. A.** (2009). Distinct roles for CARMIL isoforms in cell migration. *Mol. Biol. Cell* **20**, 5290-5305.
- Lienkamp, S. S., Liu, K., Karner, C. M., Carroll, T. J., Ronneberger, O., Wallingford, J. B. and Walz, G.** (2012). Vertebrate kidney tubules elongate using a planar cell polarity-dependent, rosette-based mechanism of convergent extension. *Nat. Genet.* **44**, 1382-1387.
- Lundquist, E. A.** (2006). Small GTPases. *WormBook* 1-18.
- Lundquist, E. A., Reddien, P. W., Hartweg, E., Horvitz, H. R. and Bargmann, C. I.** (2001). Three *C. elegans* Rac proteins and several alternative Rac regulators control axon guidance, cell migration and apoptotic cell phagocytosis. *Development* **128**, 4475-4488.
- McMahon, L., Legouis, R., Vonesch, J. L. and Labouesse, M.** (2001). Assembly of *C. elegans* apical junctions involves positioning and compaction by LET-413 and protein aggregation by the MAGUK protein DLG-1. *J. Cell Sci.* **114**, 2265-2277.
- Mello, C. and Fire, A.** (1995). DNA transformation. *Methods Cell Biol.* **48**, 451-482.
- Miki, H., Suetsugu, S. and Takenawa, T.** (1998). WAVE, a novel WASP-family protein involved in actin reorganization induced by Rac. *EMBO J.* **17**, 6932-6941.
- Munro, E. M. and Odell, G.** (2002a). Morphogenetic pattern formation during ascidian notochord formation is regulative and highly robust. *Development* **129**, 1-12.
- Munro, E. M. and Odell, G. M.** (2002b). Polarized basolateral cell motility underlies invagination and convergent extension of the ascidian notochord. *Development* **129**, 13-24.
- Nishimura, T., Honda, H. and Takeichi, M.** (2012). Planar cell polarity links axes of spatial dynamics in neural-tube closure. *Cell* **149**, 1084-1097.
- Nobes, C. D. and Hall, A.** (1995). Rho, rac, and cdc42 GTPases regulate the assembly of multimolecular focal complexes associated with actin stress fibers, lamellipodia, and filopodia. *Cell* **81**, 53-62.
- Paré, A. C., Vichas, A., Fincher, C. T., Mirman, Z., Farrell, D. L., Mainieri, A. and Zallen, J. A.** (2014). A positional Toll receptor code directs convergent extension in *Drosophila*. *Nature* **515**, 523-527.
- Patel, F. B., Bernadskaya, Y. Y., Chen, E., Jobanputra, A., Pooladi, Z., Freeman, K. L., Gally, C., Mohler, W. A. and Soto, M. C.** (2008). The WAVE/SCAR complex promotes polarized cell movements and actin enrichment in epithelia during *C. elegans* embryogenesis. *Dev. Biol.* **324**, 297-309.
- Plenefisch, J., Xiao, H., Mei, B., Geng, J., Komuniecki, P. R. and Komuniecki, R.** (2000). Secretion of a novel class of iFABPs in nematodes: coordinate use of the *Ascaris*/*Caenorhabditis* model systems. *Mol. Biochem. Parasitol.* **105**, 223-236.
- Reddien, P. W. and Horvitz, H. R.** (2000). CED-2/CrkII and CED-10/Rac control phagocytosis and cell migration in *Caenorhabditis elegans*. *Nat. Cell Biol.* **2**, 131-136.
- Sawa, M.** (2003). Essential role of the *C. elegans* Arp2/3 complex in cell migration during ventral enclosure. *J. Cell Sci.* **116**, 1505-1518.
- Schneider, C. A., Rasband, W. S. and Eliceiri, K. W.** (2012). NIH Image to ImageJ: 25 years of image analysis. *Nat. Methods* **9**, 671-675.
- Shakir, M. A., Gill, J. S. and Lundquist, E. A.** (2006). Interactions of UNC-34 Enabled with Rac GTPases and the NIK kinase MIG-15 in *Caenorhabditis elegans* axon pathfinding and neuronal migration. *Genetics* **172**, 893-913.
- Shakir, M. A., Jiang, K., Struckhoff, E. C., Demarco, R. S., Patel, F. B., Soto, M. C. and Lundquist, E. A.** (2008). The Arp2/3 activators WAVE and WASP have distinct genetic interactions with Rac GTPases in *Caenorhabditis elegans* axon guidance. *Genetics* **179**, 1957-1971.
- Simões, S. d. M., Blankenship, J. T., Weitz, O., Farrell, D. L., Tamada, M., Fernandez-Gonzalez, R. and Zallen, J. A.** (2010). Rho-kinase directs Bazooka/Par-3 planar polarity during *Drosophila* axis elongation. *Dev. Cell* **19**, 377-388.
- Simões, S. d. M., Mainieri, A. and Zallen, J. A.** (2014). Rho GTPase and Shroom direct planar polarized actomyosin contractility during convergent extension. *J. Cell Biol.* **204**, 575-589.
- Soto, M. C., Qadota, H., Kasuya, K., Inoue, M., Tsuboi, D., Mello, C. C. and Kaibuchi, K.** (2002). The GEX-2 and GEX-3 proteins are required for tissue morphogenesis and cell migrations in *C. elegans*. *Genes Dev.* **16**, 620-632.
- Steven, R., Kubiseski, T. J., Zheng, H., Kulkarni, S., Mancillas, J., Ruiz Morales, A., Hogue, C. W. V., Pawson, T. and Culotti, J.** (1998). UNC-73 activates the Rac GTPase and is required for cell and growth cone migrations in *C. elegans*. *Cell* **92**, 785-795.
- Steven, R., Zhang, L., Culotti, J. and Pawson, T.** (2005). The UNC-73/Trio RhoGEF-2 domain is required in separate isoforms for the regulation of pharynx pumping and normal neurotransmission in *C. elegans*. *Genes Dev.* **19**, 2016-2029.
- Sulston, J. E., Schierenberg, E., White, J. G. and Thomson, J. N.** (1983). The embryonic cell lineage of the nematode *Caenorhabditis elegans*. *Dev. Biol.* **100**, 64-119.
- Takeda, S., Minakata, S., Koike, R., Kawahata, I., Narita, A., Kitazawa, M., Ota, M., Yamakuni, T., Maéda, Y. and Nitanai, Y.** (2010). Two distinct mechanisms for actin capping protein regulation—steric and allosteric inhibition. *PLoS Biol.* **8**, e1000416.
- Takenawa, T. and Suetsugu, S.** (2007). The WASP-WAVE protein network: connecting the membrane to the cytoskeleton. *Nat. Rev. Mol. Cell Biol.* **8**, 37-48.
- Vanderzalm, P. J., Pandey, A., Hurwitz, M. E., Bloom, L., Horvitz, H. R. and Garriga, G.** (2009). *C. elegans* CARMIL negatively regulates UNC-73/Trio function during neuronal development. *Development* **136**, 1201-1210.
- Walck-Shannon, E. and Hardin, J.** (2014). Cell intercalation from top to bottom. *Nat. Rev. Mol. Cell Biol.* **15**, 34-48.
- Wallingford, J. B.** (2012). Planar cell polarity and the developmental control of cell behavior in vertebrate embryos. *Annu. Rev. Cell Dev. Biol.* **28**, 627-653.
- Warrington, S. J., Strutt, H. and Strutt, D.** (2013). The Frizzled-dependent planar polarity pathway locally promotes E-cadherin turnover via recruitment of RhoGEF2. *Development* **140**, 1045-1054.
- Williams, M., Yen, W., Lu, X. and Sutherland, A.** (2014). Distinct apical and basolateral mechanisms drive planar cell polarity-dependent convergent extension of the mouse neural plate. *Dev. Cell* **29**, 34-46.
- Williams-Masson, E. M., Heid, P. J., Lavin, C. A. and Hardin, J.** (1998). The cellular mechanism of epithelial rearrangement during morphogenesis of the *Caenorhabditis elegans* dorsal hypodermis. *Dev. Biol.* **204**, 263-276.
- Withee, J., Galligan, B., Hawkins, N. and Garriga, G.** (2004). *Caenorhabditis elegans* WASP and Ena/VASP proteins play compensatory roles in morphogenesis and neuronal cell migration. *Genetics* **167**, 1165-1176.
- Wu, Y.-C., Cheng, T.-W., Lee, M.-C. and Weng, N.-Y.** (2002). Distinct rac activation pathways control *Caenorhabditis elegans* cell migration and axon outgrowth. *Dev. Biol.* **250**, 145-155.
- Yang, C., Pring, M., Wear, M. A., Huang, M., Cooper, J. A., Svitkina, T. M. and Zigmund, S. H.** (2005). Mammalian CARMIL inhibits actin filament capping by capping protein. *Dev. Cell* **9**, 209-221.
- Zallen, J. A.** (2007). Planar polarity and tissue morphogenesis. *Cell* **129**, 1051-1063.
- Zallen, J. A. and Wieschaus, E.** (2004). Patterned gene expression directs bipolar planar polarity in *Drosophila*. *Dev. Cell* **6**, 343-355.
- Zipkin, I. D., Kindt, R. M. and Kenyon, C. J.** (1997). Role of a new Rho family member in cell migration and axon guidance in *C. elegans*. *Cell* **90**, 883-894.
- Zipperlen, P., Fraser, A. G., Kamath, R. S., Martinez-Campos, M. and Ahringer, J.** (2001). Roles for 147 embryonic lethal genes on *C. elegans* chromosome I identified by RNA interference and video microscopy. *EMBO J.* **20**, 3984-3992.
- Zwolak, A., Yang, C., Feeser, E. A., Michael Ostap, E., Svitkina, T. and Dominguez, R.** (2013). CARMIL leading edge localization depends on a non-canonical PH domain and dimerization. *Nat. Commun.* **4**, 2523.
